# Supplementary material for: Molecular characterization of bacterial leaf streak resistance in hard winter wheat
Source: PubMed Central journal article supplement (PMC6637926; doi:10.7717/peerj.7276), 2019-07-15

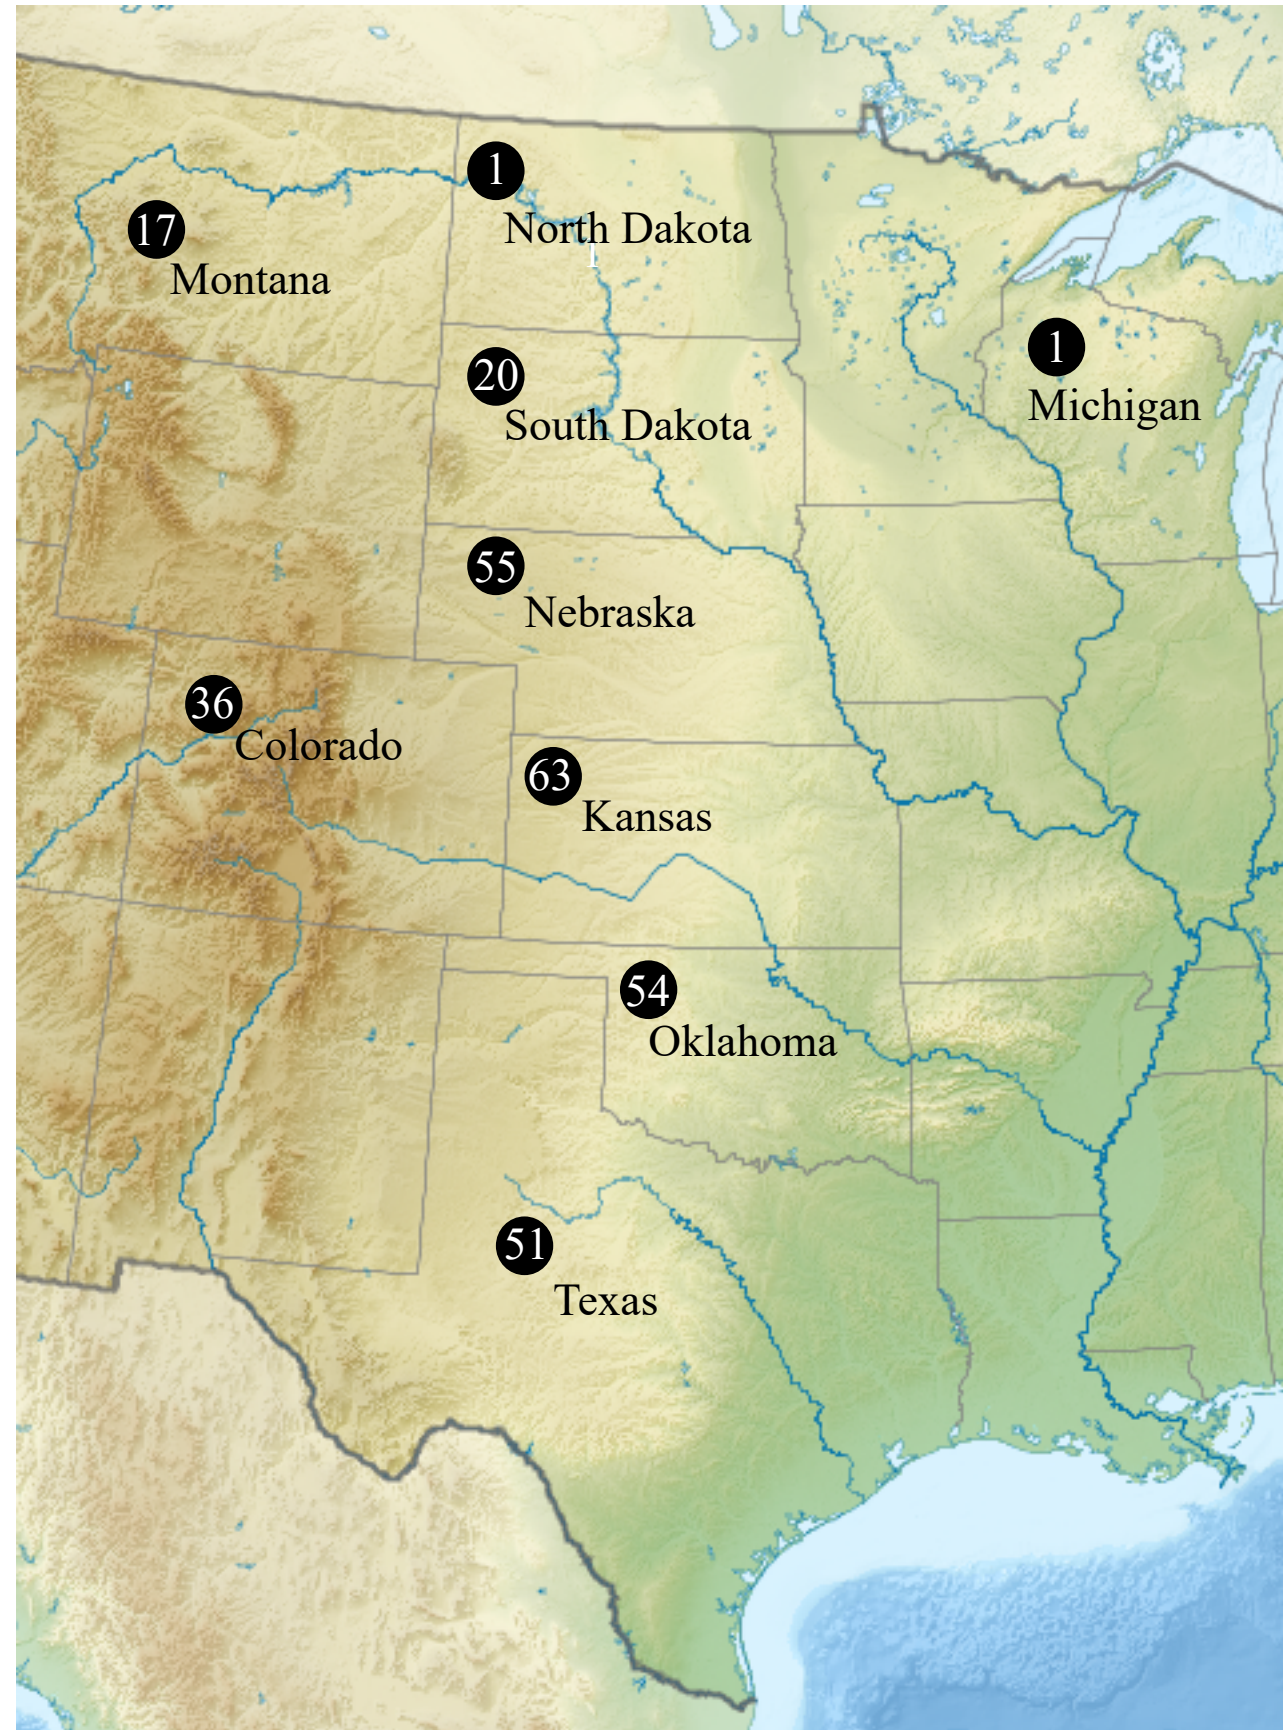

Supplement: peerj-07-7276-s001.pdf [file peerj-07-7276-s001.pdf]
